# Supplementary material for: Structural features derived from a Multiscale Analysis and 2.75D Modelling of Aeromagnetic Data over the Pitoa-Figuil Area (Northern Cameroon)
Source: Copernicus journal article supplement (doi:10.5194/se-2020-135), 2020-09-02
Supplement: Supplementary file [file se-2020-135-RC1-supplement.pdf]

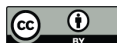

# Structural features derived from a Multiscale Analysis and 2.75D Modelling of Aeromagnetic Data over the Pitoa-Figuil Area (Northern Cameroon)

Voltaire Souga Kassia<sup>a</sup>; Theophile Ndougsa Mbarga<sup>a,b\*</sup>; Arsène Meying<sup>c</sup>; Jean Daniel Nghoh<sup>a</sup>; Steve Ngoa Embeng<sup>a</sup>

<sup>a</sup>Postgraduate School of Science, Technology and Geosciences, University of Yaoundé I, Yaoundé, Cameroon

<sup>b</sup>Department of Physics, Advanced Teacher's Training College, University of Yaoundé I, P.O. Box 47, Yaoundé, Cameroon

<sup>c</sup>School of Geology and Mining Engineering, University of Ngaoundéré, P.O. Box 115, Meiganga, Cameroon

Correspondence should be addressed to Ndougsa Mbarga Theophile; \*tndougsa@yahoo.fr

## ABSTRACT:

In the Pitoa-Figuil area (Northern Cameroon), an interpretation of aeromagnetic data was conducted. The aim of this investigation was first to emphasize lineaments hidden under geological formations and secondly to propose two 2.75D models of the subsurface structures. Different magnetic data processing techniques were used, notably horizontal gradient magnitude, analytic signal, and Euler deconvolution. These techniques in combination with the 2.75D modelling to the aeromagnetic anomaly reduced to the equator permit to understand the stratification of the deep and near surface structures, which are sources of the observed anomalies. We managed to put in evidence and characterize 18 faults and some intrusive bodies. According to Euler's solutions, anomaly sources go up to a depth of 5.3 km.

**Keywords:** Horizontal gradient magnitude, Euler deconvolution, 2.75D modelling, Fault, Intrusive body.

## 1. Introduction

Investigating depths through geomagnetic field properties is the basis of the magnetic method, the one we used for this research.

This study is focused on a well-defined area in the northern Cameroon. Several studies (Ntsama et al., 2014; Kamguia et al., 2005) reveal the presence of many Cretaceous sedimentary basins. At the beginning of the Cretaceous age, the basement of the northern Cameroon region was affected by a tectonic event due to the Benue trough set up, which generated faults that promote volcanic activities (Ntsama et al., 2014). The resulting basaltic lava flows and the accumulated alluvial deposits in Mayos buried these faults.

The aim of this research paper is firstly to highlight magnetic anomalies and correlate them with the tectonic and geological events given by existing literature in order to locate and identify buried faults. Secondly, this article tries to make its contribution to the knowledge of the



41 stratification of the Pitoa-Figuil subsurface. To achieve these purposes, some techniques such as  
 42 Analytic signal, Euler deconvolution and 2.75D modelling were applied.

## 44 2. Geological and tectonic setting

45 Fragment of the Pan-African Belt in the northern part of Cameroon, between the longitudes  
 46 13°30' - 14°15' E and latitudes 09°15' - 09°45' N, the studied area covers several cities among which  
 47 the most historical are Pitoa and Figuil. The basement complex consists of migmatite and ecinitic  
 48 rocks from the Precambrian. The sedimentary basins in and around the studied area were set up in  
 49 the Cretaceous by the NE-SW Benue trough which is one of the direct consequences of the  
 50 establishment of the gigantic moat covered by the Atlantic Ocean (Ntsama et al., 2014).

51 The various geological formations and structures of the said zone are identified on Fig. 1 and  
 52 can be grouped as follows (Toteu et al., 2004):

- 53 - Superficial formations ( $Q^3$ ) from the Quaternary age;
- 54 - Cretaceous sedimentary formations (Ci, Cm);
- 55 - Precambrian formations namely ecinites ( $\xi^1, \xi^2, \xi^3, \xi^4$ ), migmatites ( $M^1, M^2$ ), ancient  
 56 eruptive rocks ( $\gamma^1, \gamma^2$ ) and micaceous quartzites.

57 Effusive rocks are also present, notably the rhyolites and rhyolitic tuffs of the Tertiary, as well  
 58 as the undifferentiated monchiquite basalts of the Benue valley which are from the Cretaceous age.

59 The Mayo Oulo-Léré basin (Ci), which is the eastward branch of the Benue trough, extends for  
 60 about 50 km (length) with a width value for about 9 km (Ntsama et al., 2014).

61 Two NE-SW tectonic lines mark the studied area: one at the west of Boili and the other at the  
 62 West of Golombe. Most dips are vertical. The migmatite gneisses formation at the geological map  
 63 centre is intruded by a NE-SW veins of quartz. Ntsama et al. (2014) revealed the presence of faults  
 64 buried under geological formations. Most orthogneisses and migmatites come from the  
 65 transformation of granitoids due to the Panafrican deformation D2 (Daouda, 2014).

66 On the structural aspect, the northern Cameroon domain is marked by two deformation  
 67 phases (Toteu et al., 2004):

- 68 - The first phase is characterised by a foliation with variable dip and direction;
- 69 - The second one is characterised by tight and straight folds associated to a vertical axial  
 70 plane foliation.

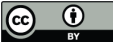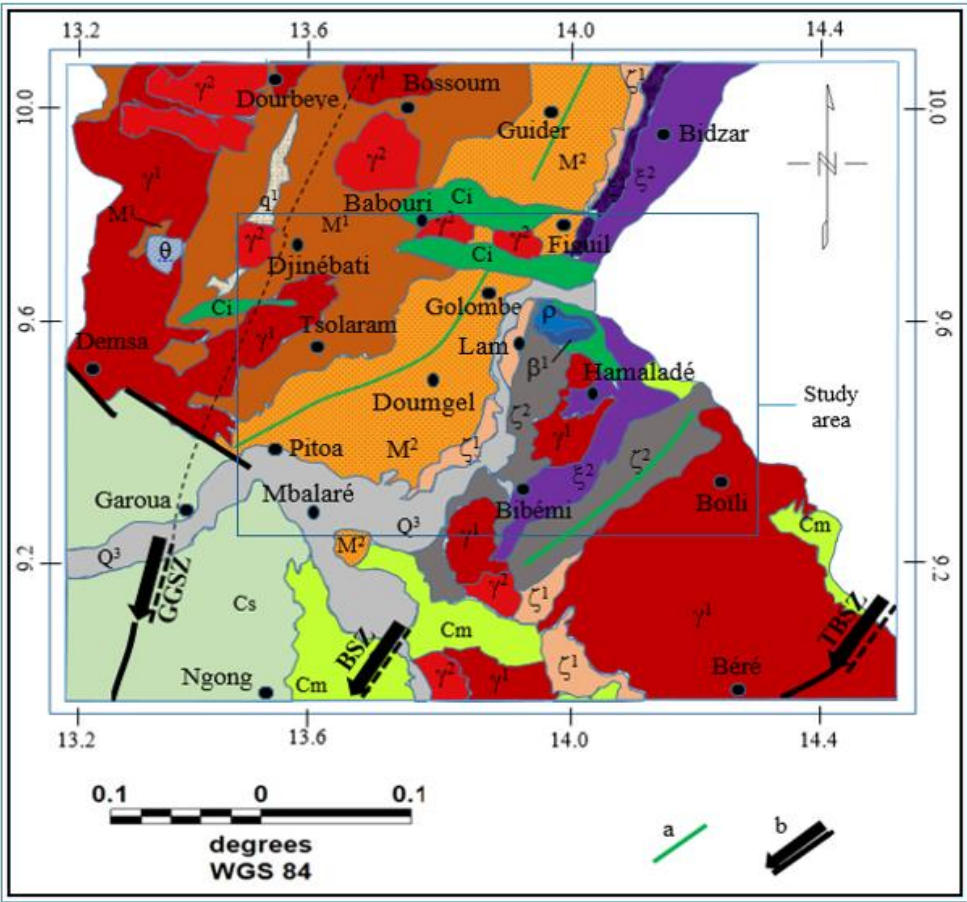

71

72 **Figure 1: Geological map of the studied area (redrawn from Ngako et al., 2008; Elangwe, 1979 ;**  
73 **this map is available at the public domain):** ( $\gamma^1$ ) Anatexia granites and granodiorites; ( $\gamma^2$ ) Monzonitic late  
74 syntectonic granites; ( $M^1$ ) Biotite anatexite; ( $M^2$ ) Migmatitic gneisses; ( $\zeta^1$ ) Lower gneisses: biotite, amphibole and  
75 pyroxene cross-cut by intrusive quartz; ( $\zeta^2$ ) Upper gneisses: grenatiferous with two micas; ( $\xi^1$ ) Lower micaschists of the  
76 Poli Group; ( $\xi^2$ ) Upper micaschists with chlorites of the Poli Group; ( $q^1$ ) Micaceous quartzites; ( $\beta^1$ ) Undifferentiated  
77 monchiquite basalts of the Bénoué valley; ( $Q^3$ ) Alluviums and lacustrine clays; ( $\theta$ ) Gabbros; ( $p$ ) Ryolites and ryolitic tuffs;  
78 ( $Ci$ ) Amakassou and Kontcha sandstone conglomerate and schisto-clays; ( $Cm$ ) Bénoué and Kontcha sandstone; ( $Cs$ )  
79 Garoua sandstone; (a) Tectonic lines; (b) Shear zones: Godé-Gormaya shear zone (GGSZ), Tcholliré-Banyo shear zone  
80 (TBSZ).

81 **3. Materials and methods**

82 In 1970, aeromagnetic data were collected by the company SURVAIR (Canada) for the Federal  
83 Republic of Cameroon. After correction of data resulting from this survey, Paterson et al. (1976),  
84 established magnetic map  and included them in their final report. These magnetic maps are the  
85 starting point and the key component of this study. We used MapInfo v11.0 to digitize them ,  
86 through the Oasis montaj software v8.4, we subtracted the International Geomagnetic Reference  
87 Field (IGRF) from the measured field to obtain the total magnetic intensity (TMI).

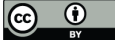

In the present paper, data filtering techniques were implemented using the Oasis montaj software v8.4.

### 3.1. Reduction to Magnetic Equator

For further data interpretation, the reduction to magnetic equator (RTE) technique is much more used in the equatorial zones to centre the magnetic anomalies in line with their sources.

The RTE is calculated following Eq. (1) (Leu, 1981):

$$R(\vartheta) = - \frac{[A(I) - i \cos(I) \cos(D - \vartheta)] \times \cos^2(D - \vartheta)}{[A^2(Ia) + \varphi^2(Ia, D)] \times [A^2(I) + \varphi^2(I, D)]} \quad (1)$$

Where:

$I$  is the geomagnetic inclination;

$D$  is the geomagnetic declination;

$A(I) = \sin(I)$  is the RTE amplitude;

$\Phi(I, D) = \cos(I) \cos(D - \vartheta)$  is the RTE phase;

$Ia$  is the inclination for RTE amplitude correction.

The RTE technique was applied to the TMI anomalies where  $-2.588^\circ$  were used as the inclination value and  $-4.132^\circ$  as declination at 1<sup>st</sup> January 1970 which is the date corresponding to the period of which data were collected.

### 3.2. Horizontal Gradient Magnitude

The horizontal gradient magnitude (HGM) is a filtering technique usually used for potential fields. It makes it possible to highlight lithological contacts of bodies in basement.

The HGM is given by Eq. (2) (Cordell and Grauch, 1982):

$$HGM(x, y) = \sqrt{\left(\frac{\partial M(x, y)}{\partial x}\right)^2 + \left(\frac{\partial M(x, y)}{\partial y}\right)^2} \quad (2)$$

Where the magnetic field is  $M(x, y)$ .

Vertical body edges are generally located through the maxima of HGM (Awoyemi et al., 2016).

### 3.3. Analytic Signal Method

The strong magnetizations of the analytic signal (AS) make it possible to highlight limit contacts of geological formations. The AS amplitude of magnetic anomaly is defined by Eq. (3) (Roest et al., 1992):

$$|AS(x, y)| = \sqrt{\left(\frac{\partial M(x, y)}{\partial x}\right)^2 + \left(\frac{\partial M(x, y)}{\partial y}\right)^2 + \left(\frac{\partial M(x, y)}{\partial z}\right)^2} \quad (3)$$

The fact that the AS is a function always positive and therefore, does not require to know the direction of the magnetized body, is a major advantage of this technique compared to the others (Jeng et al., 2003).

### 3.4. Euler Deconvolution

Applied to aeromagnetic data, it is a technique which permits to locate sources of observed anomalies and determine their depths. This technique is based on an important parameter that



accounts for the degree of homogeneity of the mathematical equation that comes into play, this parameter is named "structural index" (Durrheim, 1998). The structural index (SI) characterizes the geological type of the source (dyke, sill, pipe, cylinder, and sphere) according to its value which varies between 0 and 3 for the case of magnetic data.

The Euler's homogeneity equation in this case is the Eq. (4) below (Whitehead and Musselman, 2005):

$$(x-x_0)\left(\frac{\partial T}{\partial x}\right) + (y-y_0)\left(\frac{\partial T}{\partial y}\right) + (z-z_0)\left(\frac{\partial T}{\partial z}\right) = N(M-T) \quad (4)$$

Where:

$T$  is the total magnetic field produces at  $(x, y, z)$  by the magnetic source at  $(x_0, y_0, z_0)$ ;

$M$  is the regional value of  $T$ ;

$N$  is the structural index (SI).

With four unknown parameters  $(x, y, z, M)$ , solving the Euler's equation requires to consider a square window on the grids of gradients and field. However, this window must be sized to exclude unwanted anomalies while containing all significant solutions (Durrheim, 1998).

### 3.5. 2.75D modelling

When a source of anomalies presents a preferred extension in a given direction, profiles are interpreted perpendicularly to the main extension. The 2.75D model represents geological blocks as polygonal prisms either finite or infinite elongated following a strike direction named  $Y$  with horizontal axes  $(X)$ . The plane of the profile and the  $Y$  direction need not to be perpendiculars (Rasmussen and Pedersen, 1979).

According to Skalbeck et al. (2005), the 2.75D modelling is a potential field modelling technique based on asymmetric strike length  $(Y)$  about the profile  $(X)$ . The 2.75D modelling techniques are suitable for geological modelling, as potential field profiles may not cross a structure through its centre.

To build our magnetic models, we used the analyses of Talwani and Heirtzler (1964) and Rasmussen and Pedersen (1979). These models were obtained through GM-SYS™ which is an extension of Geosoft package software v8.4.

## 4. Results

### 4.1. RTE map

The map (Fig. 2) presents an irregular distribution of anomalies. The values in nanotesla (nT) of these anomalies range from -660.3 to 286.4 with various forms. It is thus possible to distinguish positive magnetic anomalies (dark pink and red colour) which are in great proportion on this map and a minority of negative magnetic anomalies (light and dark blue colour) which lodge the NE-SW axis.

The Lam area is marked by an elliptical bipolar anomaly with an E-W direction over a length of about 15.5 km. This anomaly has an intensity of -600 nT for the negative pole and 200 nT for the positive pole which is more developed than the negative one. The positive pole at this point correlates well with the geological map (Fig. 1), which indicates the presence of monchiquite basalts





167 of the Benue valley and rhyolitic tuffs which are rocks with a strong magnetic response. In short,  
 168 these are anomalies that materialize the signature of a geological structure buried under the covers.  
 169 The negative lobe suggests the presence of geological formations with low susceptibilities such as  
 170 sandstone and shale clays as indicated on the geological map.

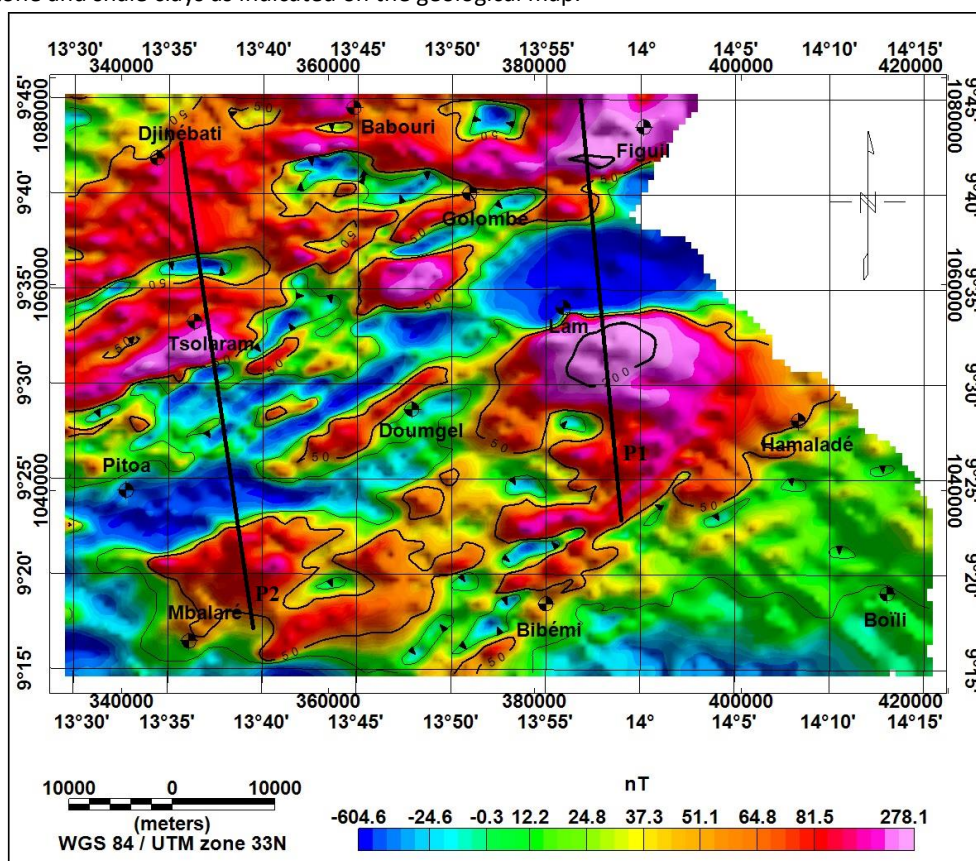

Figure 2: Color shaded reduction to equator (RTE) map.

173 The same observation is made in south of Pitoa where this time we have -400 nT for the  
 174 negative pole and about 75 nT for the positive one with a mainly ENE-WSW direction.

175 In the western Doumgel, between the two previous bipolar anomalies, there is a group of  
 176 small positive (70 nT) and negative (-500 nT) linear anomalies with ENE-WSW direction. The forms  
 177 and directions of these anomalies and those of the southern Pitoa allow us to believe that they  
 178 would be the outcome of the same tectonic event.

179 From the magnetic point of view, the subsurface in Northern Cameroon is perturbed by  
 180 several anomalies with different wavelengths, most of them are related to the Precambrian  
 181 basement formations. Some anomalies reflect sedimentary deposits. Bipolar anomalies could be  
 182 interpreted as very deep geological structures hidden by extensive formations (Feumoe et al.,  
 183 2012).



## 4.2. HGM map

The horizontal gradient magnitude technique is a great way to locate geological contacts in the basement and faults by determining their directions (Khattach et al., 2006). To better distinguish deeper geological structures, the HGM method is applied to the 2 km upward continued RTE map and the result is given by Fig. 3.

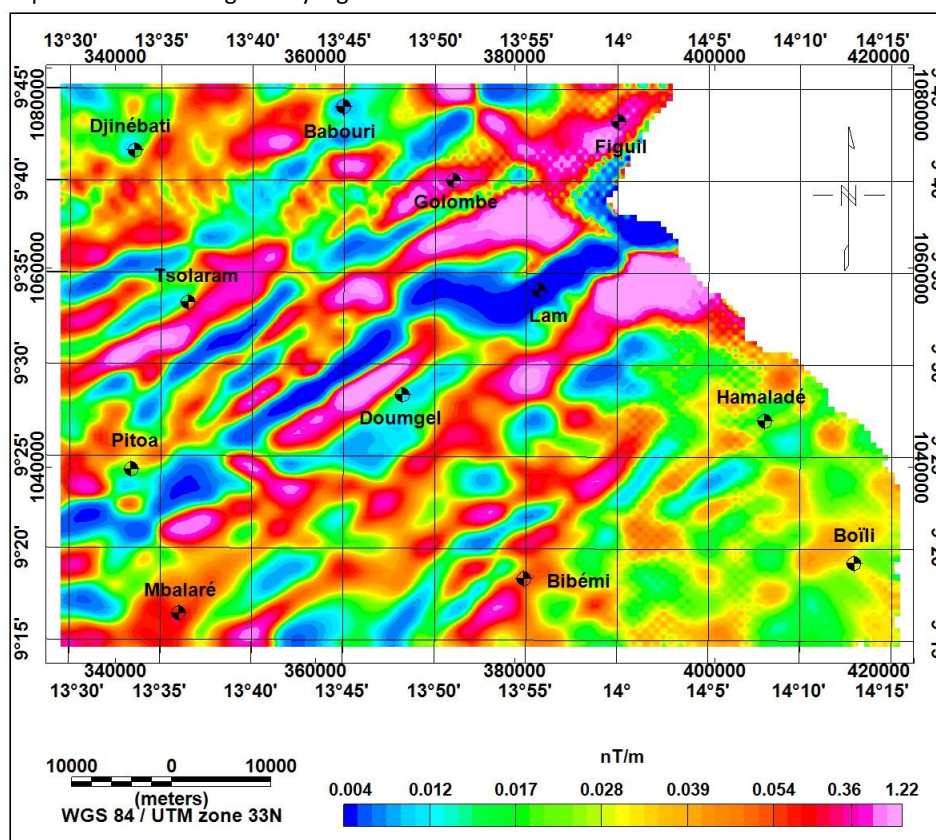

**Figure 3: Horizontal Gradient Magnitude (HGM) map**

There is a wide variety of anomalies, most of them are linear with different lengths and their amplitudes fluctuate between 0.004 and 1.22 nT/m.

The corresponding structures are mainly oriented in the NE-SW direction. Some elliptical and unformed anomalies around Figuil and at the northern Tsolaram are plainly observable. Outcrops or intrusive bodies can explain the high level of the amplitude gradients which characterize them. Many linear and curved bipolar magnetic anomalies are observed along the Pitoa-Figuil axis. Viewed their form, some of these anomalies are certainly magnetic responses of dykes or faults.

For automatic location of the HGM maxima, we adopted the Blakely and Simpson (1986) method. The resulting map (Fig. 5) shows that local maxima (green peaks) form narrow wrinkles above abrupt susceptibility fluctuations.



On the centre of the map, more precisely in the area covered by the migmatite gneisses, the configuration of the NE-SW maxima suggests the presence of structural deformation at the regional scale in the basement stratum. This correlates well with the linear anomalies of the RTE map and are interpreted as being the direct consequences of the settlement of the Benue tectonic trough due to the opening of the Atlantic.

#### 4.3. AS map

The AS method is applied to the 2 km upward continued RTE map and the result is given by Fig. 4. The high magnetic signals of the AS map correlate well with the magnetic response of migmatite rocks found in the Lam area and around the Figuil-Pitoe axis with a NE-SW trend. Geological contacts represented by harsh signal contrasts are emphasized; among them, appears the biotite anatexite - migmatite gneisses contact (white outline).

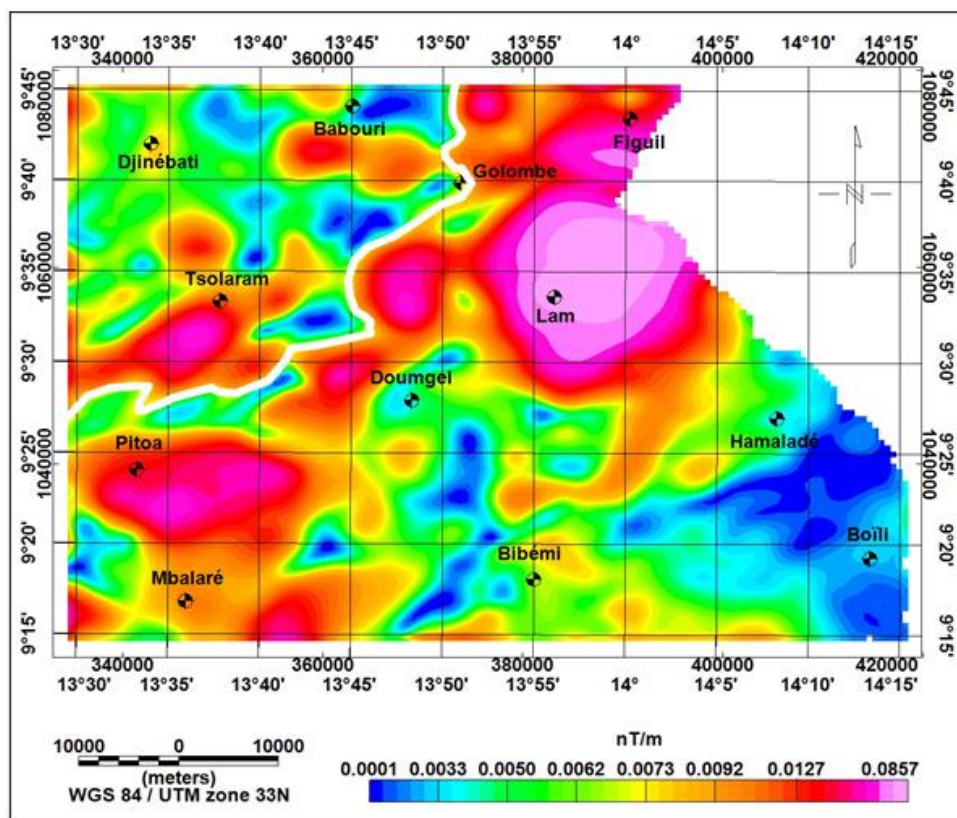

Figure 4: Analytic signal (AS) map

AS and HGM maxima were generated, pooled, and superimposed in a single map as shown on Fig. 5. Peaks are quasi-parallel is the proof that the geological structures of our study region admit dips linked to dextral and sinistral deformations which affected it (Ngako et al., 2008). The





maxima of the HGM are more abundant than those of the AS. According to Cordell and Grauch (1982), areas where the AS maxima are isolated, indicate the much deeper structures (southern Pitoa, Doumgel and Lam area).

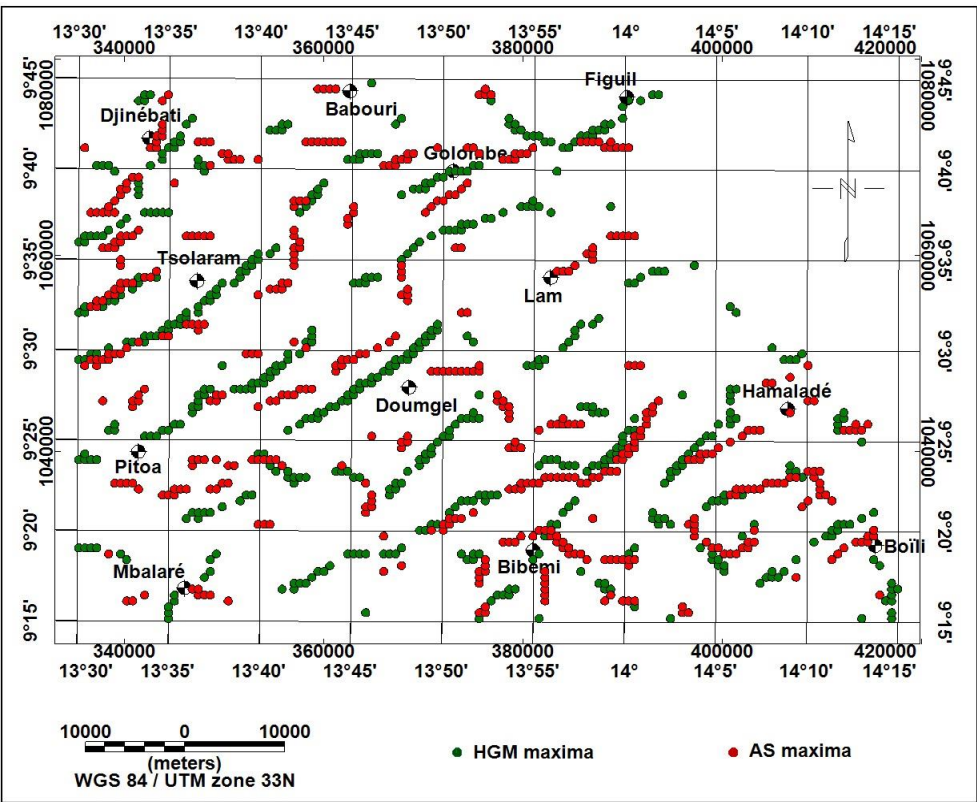

Figure 5: HGM (in green) and AS (in red) peaks map.

#### 4.4. Euler's solutions map

The 2 km upward continued RTE map is the map on which was applied the Euler deconvolution method, to determine depths of anomaly sources by setting the flying height of plane observation at 235 m, the tolerance at 15% and the structural index at 1. Given the importance of the wavelength of anomalies and the value of the grid cell, we have chosen a Nyquist window size of 15 km × 15 km. The result is given by Fig. 6 below

On the Euler's solutions map above, several structures with depth varying from 1400 to 5300 m are highlighted. We can clearly distinguish deep faults and intrusive bodies which are characterized by the non-linear or the stacking of Euler's solutions (Keating and Pilkington, 2004; Ndougsa et al., 2012). This is observed in the Lam area and southern Pitoa. Some of these intrusive bodies are located around the contact zone between the biotite anatexite and the migmatite gneisses stratum at a depth of about 4000 m. From this same interpretation, intrusive bodies at



almost the same depth, are also perceived nearby the contact zone between upper gneisses and upper mica schists formations in the Eastern Bibémi.

As for rectilinear and continuous alignments of Euler's solutions found in the northern and western areas, they would be the magnetic signatures of normal faults hidden under geological formations.

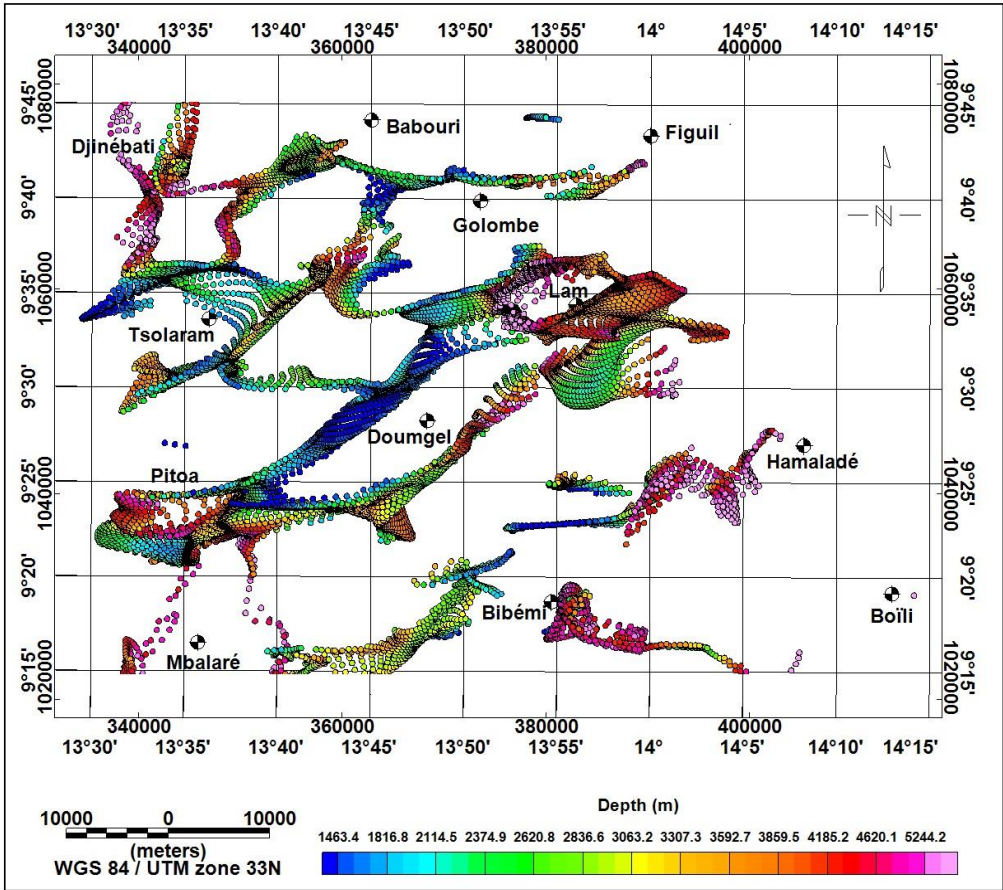

Figure 6: Euler's solutions map

Referring to the Blakely and Simpson (1986) method, the combined analysis of the Euler's solution map (Fig. 6) and the superposition of peaks map (Fig. 5) obtained from the HGM and AS maps permits us to generate the deep faults map (Fig. 7). The faults map counts a total of 36 faults mainly directed to NW-SE, E-W and NE-SW. The Table 1 below presents the characteristics of some of these faults, namely their respective dip and depth.



254

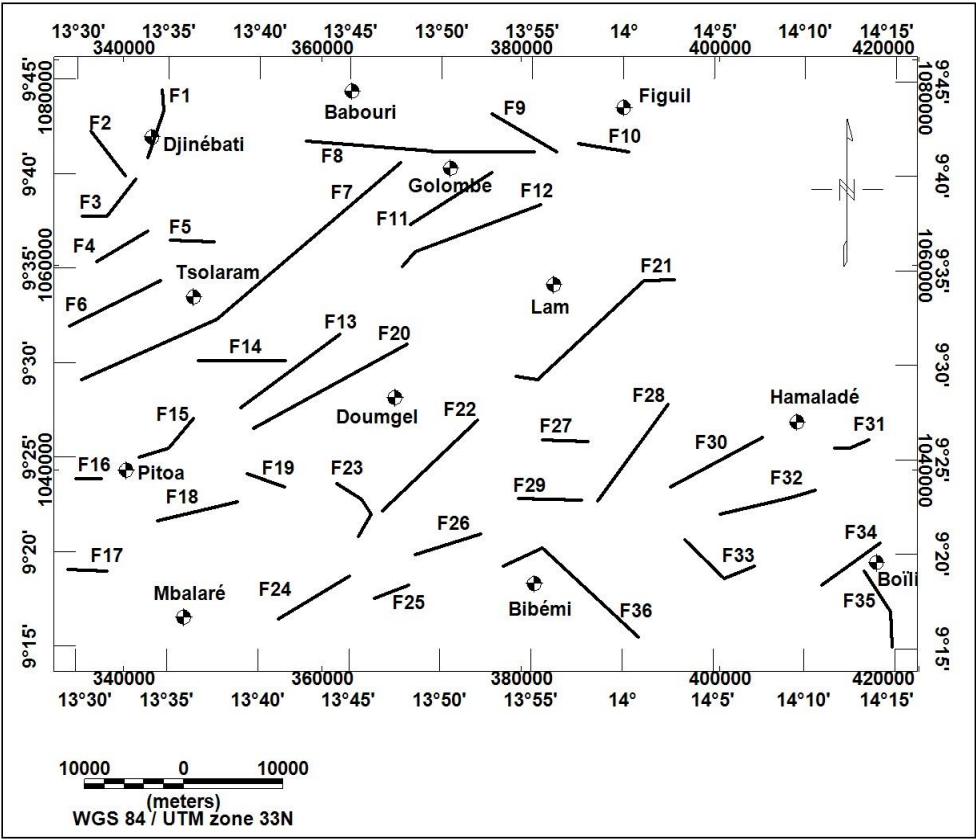

255

256 **Figure 7: Faults map resulting from Euler's solutions and HGM-AS maxima maps**

257

258 Dips are mainly N-W and the deepest faults are in the south of the surveyed area. The contact  
259 zone between biotite anatexite and migmatite gneisses formations is well marked by a large  
260 number of faults (F9, F12, F13, F15, F16 and F20).

261 Given its direction, the fault F7 could be associated to the tectonic line observed in western  
262 Golombe as it is shown in the geological map (Fig. 1).

263

264

265

266

267

268

269

270



| Faults | Dip      | Depth (m) |
|--------|----------|-----------|
| F1     | S-E      | 2600      |
| F4     | N-W      | 1400      |
| F5     | N        | 2000      |
| F6     | Vertical | 1400      |
| F7     | Vertical | 2500      |
| F12    | N-W      | 1500      |
| F13    | N-W      | 1400      |
| F15    | N-W      | 1900      |
| F19    | S        | 3000      |
| F21    | N-W      | 4300      |
| F22    | N-W      | 2600      |
| F23    | S-W      | 3500      |
| F24    | N-W      | 3300      |
| F26    | N-W      | 2500      |
| F27    | N        | 1800      |
| F28    | N-W      | 4700      |
| F29    | N        | 1400      |
| F30    | N-W      | 4500      |

**Table 1: Faults characterization of the studied area**

#### 4.5. 2.75D magnetic models

The two magnetic models (Fig. 8 and Fig. 9) are carried out respectively from profiles P1 and P2 drawn on the RTE map (Fig. 2). The earth's magnetic field, the declination, and the inclination of the region were used as main input parameters. Referring to the geological map, the profile P1 over cross from south to north: upper gneisses, monchiquite basalts of the Benue valley, rhyolitic tuffs, alluviums, Kontcha sandstone conglomerate and anatexia granites. While the profile P2 extends along the axis Djinébat-Mbalaré, over cross from the south to north: alluviums, migmatite gneisses, biotite anatexite and anatexia granites. Magnetic properties for a given model layer, are assumed continuous and constant.

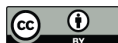

281

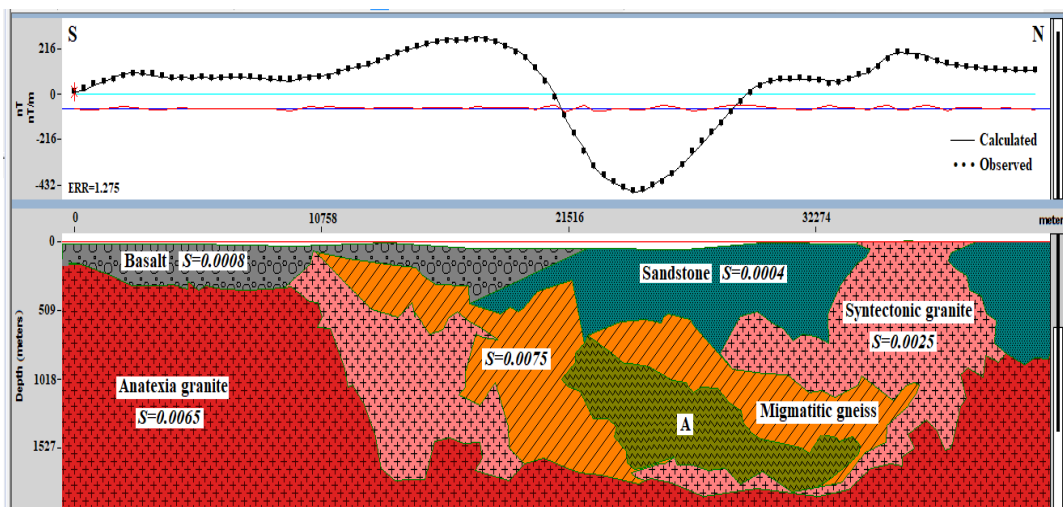

282

283

284

285

Figure 8: 2.75D model obtained from profile P1

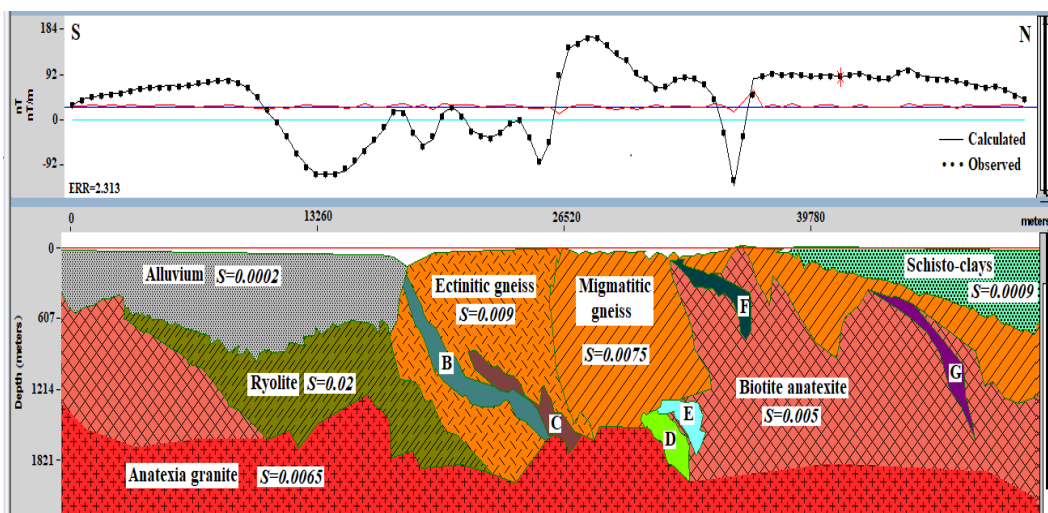

286

287

288

Figure 9: 2.75D model obtained from profile P2

#### 4.5.1. Profile P1

290

291

292

293

294

The profile P1 is 41370.7 metres long (X). According to Skalbeck et al. (2005), the strike lengths is  $Y=31028.1$  metres. Starting from south to north, the curve of the profile P1 passes through three major anomalies on the RTE map: the first one (positive intensity) is at the northern Bibémi, the second (negative) is in the Lam area and the third one (positive) is in the Figuil area. This justifies the fact that this curve is in the form of a potential well (U-shape).



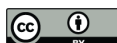

Regarding the layout of formations, we have a granitic basement whereas on the surface, basalt rocks are distinctly separated from a sediments deposit, which correlates in part with the information given by the geological map (Fig. 1) since this does not reveal the presence of basalt in the northern Bibémi but rather in the Lam area. Given the lithology of the magnetic model, we can also see that the syntectonic granite formation was set up well before the migmatite gneiss formation. The previous formation is intruded by a large body A with a susceptibility value of  $S = 0.03$  SI. Given its susceptibility (Clark and Emerson, 1991) and the environment in which it is found, the body A could be diorite because gneiss with diorite composition is listed on the geological map all around the studied area.

#### 4.5.2. Profile P2

The profile P2 is 51867.4 metres long (X). According to Skalbeck et al. (2005), the strike lengths is  $Y=38900.6$  metres. Starting from south to north, the curve of the profile P2 passes through several anomalies with variable wavelength from one to another alternatively positive and negative, hence a much wavy curve with several peaks. This reflects the fact that this part of the studied area has much more rugged subsurface. In other words, it has undergone many tectonic events, which could be at the origin of several infiltrations from where the plurality of intrusive bodies observed in layers.

The basement is made of granitic formation on which rests a biotite anatexite layer intruded by three bodies E, F and G with respective susceptibility value of -0.0001, 0.015 and 0.007 SI. At this layer, a formation of rhyolite is juxtaposed. On the surface we have an alluvial deposit which is separated from the schisto-clays by two gneiss formations, namely ectinite gneiss and migmatite gneiss. Ectinite gneiss is intruded by two bodies B and C with respective susceptibility value of -0.003 and -0.00001 SI.

From these magnetic models, we deduce that our studied area rests on a granitic basement which, according to the geological map, dates from the Precambrian period. The predominant rock is migmatite gneisses which is a formation directly connected to the basement in some places.

Given the environment of intrusive bodies and their susceptibility value (Clark and Emerson, 1991), a suggestion on their nature is given in Table 2.

| Rock | Susceptibility | Nature      |
|------|----------------|-------------|
| A    | 0.03           | Diorite     |
| B    | -0.0003        | Calcite     |
| C    | -0.00001       | Quartz      |
| D    | 0.013          | Diopside    |
| E    | -0.0001        | Graphite    |
| F    | 0.15           | Pyroxenite  |
| G    | 0.007          | Amphibolite |

Table 2: Nature suggestion of intrusive bodies

#### 5. Discussion

The choice of the window used for Euler's solutions is described by Marson and Klingele (1993). According to these authors, the wavelength of the observed anomalies and the grid cell define the



appropriate window size. Concerning the structural index (SI or N), Reid et al. (1990) concluded that low values (0 and 1) provide the best estimations of depths for sills and dykes. In this case, we focused on detection of anomaly sources, the determination of their depths and the localization of faults and contacts in the studied area, that is why we have chosen a value of  $N = 1$ . Regarding tolerance, we have set it at 15% because it is at this value that we observe a strong concordance between Euler's solutions and their depths with many short and long length wave anomalies. Concerning the Euler's solutions window, given the extent of structures in the region, we have adopted a window size of "15 kmx15 km". As we are interested by deeper structures, the last three methods above (HGM, AS and Euler Deconvolution) were applied to the upward continued RTE map to remove the outcome of superficial bodies.

From all the magnetic techniques we have applied, it transpires that dykes and faulted folds abound in the studied area. They are buried under diverse geological formations. Magnetic models show that these formations, notably gneiss and anatexite biotite, are marked by numerous intrusions.

The most of faults detected in the studied area were probably set up by the same event which affected considerably the area. This event was certainly the reactivated Pan-African shear zones.

According to Njanko et al. (2010), the NE and NW structures in the studied area result from two deformation processes recorded in the Pan-African belt, namely: sinistral shearing and dextral shearing. In addition, the N-S Gode-Gormaya shear zone (GGSZ) is probably also at the origin of some highlighted faults (Ngako et al., 2008).

Faults with NE-SW dip are the most abundant. They are found in the area underlain by migmatite gneisses and biotite anatexite formations. This is in accordance with the investigations of Njandjock et al. (2006) for whom, most of faults in the studied area and surrounding areas are covered by gneiss, sand or basalt. Magnetic models indicate the presence of basalts and gneisses on the surface (Fig. 8 and 9), they are approving the thoughts of the authors above.

Furthermore, because of the same trending, the magnetic anomalies observed in the studied area could also be the consequences of the Eburnean orogeny would have intensively modified the northern Cameroon substratum. At the Cretaceous times, the setup of the Atlantic Ocean is one of the most important events that affected the geodynamic evolution of the studied area (Nguimbous et al., 2010). This event can also explain the opening of the above-mentioned faults and the very upheaval layout of formations (vertical contacts) presented by magnetic models.

## 6. Conclusion

The purpose of this work was to help make the knowledge about Pitoa-Figuil basement easy to understand. The combination of graphical methods (RTP) and analytical methods (HGM, AS, Euler deconvolution) highlighted contact zones of some geological formations and permitted to locate magnetic sources and estimate their depths related to shearing deformations. Results of these complementary methods helped to characterize 18 faults in the studied area. Their major dip is N-W. The location of boundary between the migmatite gneisses and biotite anatexite formations given by the geological map is confirmed. After justifying the depth values of faults described by the Euler deconvolution, magnetic models have shown that our studied area has undergone numerous

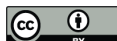

369 tectonic events (several intrusions). Most of the contacts are vertical. These models have also  
 370 taught us that the basement of our studied area is granitic, above which rest certain formations that  
 371 are flush with the surface. Furthermore, this study allowed us to suspect that, the settlement of the  
 372 Benue tectonic trough after the opening of the Atlantic, impacted the studied area subsurface in the  
 373 Northern Cameroon.

#### 374 **Data Availability**

375 The data used to support the findings of this study are available from the corresponding author upon  
 376 request.

#### 377 **Author Contribution**

378 Voltaire Souga Kassia performed the data analyses, modelling and preliminary interpretation including  
 379 preparation of the manuscript in conjunction with all the co-authors; Theophile Ndougsa-Mbarga  
 380 design the topic, gives the orientations for the investigation and reviewed the quality of the models and  
 381 related interpretation and the entire manuscript ; Arsène Meying defines the criteria and the physical  
 382 parameters for the 2D3/4 modelling with the first author; Jean Daniel Ngoh and Steve Ngoa Embeng  
 383 have worked on the review of quality and quantitative analyses of respectively maps and 2D3/4 models.

#### 384 **Competing Interest**

385 The authors declare that there are no conflicts of interest regarding the publication of this paper.

#### 386 **Acknowledgements**

387 The authors are grateful to the reviewers for their valuable observations and constructive remarks  
 388 making the manuscript being clearer.

#### 389 **References**

- 390 Awoyemi, M. O., Babatunde, A. A., Sesan, C. F., Abiodun, A. E., Sakiru, O. H., Olatunbosun, A. A., and  
 391 Chinwike, O. G.: Investigation of basement fault propagation in Chad Basin of Nigeria using  
 392 high resolution aeromagnetic data, *International Journal of Geosciences*, 7, 736-744, 2016.
- 393 Blakely, R. J. and Simpson, R. W.: Approximating Edges of Source Bodies from Magnetic or Gravity  
 394 Anomalies, *Geophysics*, 51, 1494-1498, 1986.
- 395 Clark, D. A. and Emerson, D. W.: Notes on rock magnetization characteristics in applied geophysical  
 396 studies, *Exploration Geophysics*, 22, 547-555, 1991.
- 397 Cordell, L. and Grauch, V. J.: Mapping basement magnetization zones from aeromagnetic data in the  
 398 San Juan Basin, New Mexico, 52<sup>nd</sup> Annual International Meeting, Society of Exploration  
 399 Geophysicists, Dallas, 246-248, 1982.
- 400 Daouda, D.: Les plutons de Guider et de Bossoum-Pologozom (chaîne panafricaine au Nord-  
 401 Cameroun): analyses pétrographique, structurale, magnétique, géochronologique et  
 402 implications géodynamiques, Ph.D. thesis, Université de Toulouse, France, 261 pp., 2014.
- 403 Durrheim, R. J. and Cooper, R. J.: EULDEP: A Program for the Euler Deconvolution of Magnetic and  
 404 Gravity Data, *Computers and Geosciences*, 24, 6, 545-550, 1998
- 405 Feumoe, A. N., Ndougsa Mbarga, T., Manguelle Dicoum, E., and Farhead, D.: Delineation of  
 406 Tectonic Lineaments Using Aeromagnetic Data for the South-East Cameroon Area, *Geofizika*,  
 407 29, 175-192, 2012.

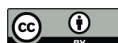

- 408 Jeng, Y., Lee, Y. L., Chen, C. Y., and Lin, J. M.: Integrated signal enhancements in magnetic  
 409 investigation in archaeology, *Journal of Applied Geophysics*, 53, 31–48, 2003.
- 410 Kamguia, J., Manguelle-Dicoum, E., Tabod, C. T., and Tadjou, J. M.: Geological models deduced from  
 411 gravity data in the Garoua basin, Cameroon, *Journal of Geophysics and Engineering*, 2, 2, 147–  
 412 152, 2005.
- 413 Khattach, D., Mraoui, H., Sbibi, D., and Chennouf, T. : Analyse multi-échelle par ondelettes des  
 414 contacts géologiques : application à la gravimétrie du Maroc nord oriental, *Geosciences*, 338,  
 415 521–526, 2006.
- 416 Keating, P. and Pilkington, M.: Euler deconvolution of the analytic signal and its application to  
 417 magnetic interpretation, *Geophysical Prospecting*, 52, 3, 165–182, 2004.
- 418 Leu, L. K.: Use of reduction to the equator process for magnetic data interpretation, *Society of*  
 419 *Exploration Geophysicists*, Los Angeles, Abstract P1.2, *Geophysics*, 47, 445, 1981.
- 420 Marson, I. and Klingele, E. E.: Advantages of using the vertical gradient of gravity for 3D  
 421 interpretation, *Geophysics*, 58, 1588–1595, 1993.
- 422 Ngako, V., Affaton, P., and Njongfang, E.: Pan-African Tectonics in Northwestern Cameroon,  
 423 Implication for the History of Western Gondwana, *Gondwana Research*, 14, 509–522, 2008.
- 424 Nguimbous Kouoh, J. J., Ndougsa Mbarga, T., Njandjock Nouck, P., Eyike, A., Campos-Enriquez, J. O.,  
 425 and Manguelle-Dicoum, E.: The structure of the Goulfey-Tourba sedimentary basin (Chad-  
 426 Cameroon): a gravity study, *Geofisica Internacional*, 49, 4, 412–425, 2010.
- 427 Njandjock Nouck, P., Manguelle-Dicoum, E., Ndougsa Mbarga, T., and Tabod, T. C.: Spectral analysis  
 428 and gravity modelling in the Yagoua, Cameroun, sedimentary basin, *Geofisica Internacional*,  
 429 45, 2, 209–215, 2006.
- 430 Njanko, T., Nédélec, A., Kwékam, M., Siqueira, R., and Esteban, L.: Emplacement and Deformation of  
 431 the Fomopéa Pluton: Implication for the Pan-African History of Western Cameroon, *Journal of*  
 432 *Structural Geology*, 32, 306–320, 2010.
- 433 Ntsama, A. J., Bessong, M., Hell, J. V., Mbesse, C. O., Nolla, J. D., Dissombo, A. N., Edimo, Eyong, J. T.,  
 434 Mbassa, B. J., Mouloud, B. I., Vignaud, P. J., and Mfoumbeng, M. P.: The Importance of  
 435 Diagenetic Processes in Sandstones Facies of the Hamakoussou Sedimentary Basin in North  
 436 Cameroon: Influence on Reservoir Quality, *International Journal of Sciences, Basic and Applied*  
 437 *Research*, 13, 2, 220–230, 2014.
- 438 Paterson, Grant, and Watson Ltd.: Études aéromagnétiques sur certaines régions de la République  
 439 Unie du Cameroun. Rapport d’interprétation : Agence Canadienne de Développement  
 440 International, Toronto, Canada, 1976.
- 441 Phillips, J. D.: Processing and Interpretation of Aeromagnetic Data for the Santa Cruz Basin-  
 442 Patagonia Mountain Area, South Central Arizona, US Geological Survey, Open File Report, 02-  
 443 98, 2001.
- 444 Rasmussen, R. and Pedersen, L. B.: End corrections in potential field modelling, *Geophysical*  
 445 *Prospecting*, 27, 749–760, 1979.
- 446 Roest, W. R., Verhoef, J., and Pilkington, M.: Magnetic interpretation using the 3D analytic signal,  
 447 *Geophysics*, 57, 116–125, 1992.



- 448 Skalbeck, J. D., Karlin, R. E., Shevenell, L., and Widmer, M. C.: Gravity and aeromagnetic modelling  
 449 of alluvial basins in the southern Truckee Meadows adjacent to the Steamboat Hills  
 450 geothermal area, Washoe County, Nevada, *Geophysics*, 70, 3, 81-89, 2005.
- 451 Talwani, M. and Heirtzler, J. R.: Computation of magnetic anomalies caused by two-dimensional  
 452 bodies of arbitrary shape, In: Parks G. A. (ed.)-Computers in the Mineral Industries, Part 1,  
 453 Stanford University Publications, Geological Sciences, 9, 464–480, 1964.
- 454 Toteu, S. F., Penaye, J., and Poudjom, Y. D.: Geodynamic Evolution of the Pan-African Belt in Central  
 455 Africa with Special Reference to Cameroon, *Canadian Journal of Earth Sciences*, 41, 73-85,  
 456 2004.
- 457 Whitehead, N. and Musselman, C.: Processing, Analysis and Visualization System for 3D Inversion of  
 458 Potential Field Data in Oasis montaj v6.1. Montaj Grav/Mag Interpretation,  
 459 <https://fr.scribd.com/document/349623750/montajGravMagInterpretation-pdf/>, last access:  
 460 11 June 2020, 2005.
